# Supplementary material for: Mammary-specific inactivation of E-cadherin and p53 impairs functional gland development and leads to pleomorphic invasive lobular carcinoma in mice
Source: PubMed Central journal article supplement — Dis Model Mech. 2011 Jan 31;4(3):347–58. doi: 10.1242/dmm.006395 (PMC3097456; doi:10.1242/dmm.006395), 2011-01-31
Supplement: supp_006395_DMM006395TableS1.pdf [file supp_006395_DMM006395TableS1.pdf]

**Supplementary Table 1. Comparative histochemistry of mammary tumors from the *Wcre;Cdh1<sup>F</sup>;Trp53<sup>F</sup>* mouse model.**

|                                                    | Mouse #     | Histology #  | Tumor morphology | GP     | CK8       | CK14      | SMA    | Vimentin      | E-cadherin    | β-catenin | ER    |
|----------------------------------------------------|-------------|--------------|------------------|--------|-----------|-----------|--------|---------------|---------------|-----------|-------|
| <i>Wcre;Trp53<sup>F/F</sup></i>                    | 129644      | 04DER-010-2  | AC               | E.     | +         | +(f)      | -      | -             | +             | +         | -     |
|                                                    | 151284      | 04DER-011-4  | AC + SC/CS       | E + I  | +         | +         | -      | -             | +(AC)         | +(AC)     | +     |
|                                                    | 167897      | 04DER-014-4  | SC/CS            | I      | +         | +         | -      | -             | -             | -         | -     |
|                                                    | 151297      | 04DER-015-1  | SC/CS            | E      | +(f)      | +(f)      | -      | +             | -             | ± (cyt)   | -     |
|                                                    | 157648      | 04DER-020-1  | AC + SC/CS       | E      | +(AC)     | -         | +(sar) | ± (sar)       | +(AC)         | +(AC)     | -     |
|                                                    | 155947      | 04DER-021-1  | SC/CS            | E      | +(f)      | -         | -      | -             | -             | -         | -     |
|                                                    | 151287      | 04DER-031-3  | AC               | E      | +         | ±(f)      | -      | -             | +             | ± (cyt)   | -     |
|                                                    | 151285      | 04DER-035-4  | SC/CS            | E      | +         | +         | -      | -             | +             | +         | -     |
| 151288                                             | 04DER-037-6 | SC/CS        | E                | +(f)   | +(f)      | +(f)      | +(f)   | +(f, mem+cyt) | +(f, mem+cyt) | -         |       |
| <i>Wcre;Cdh1<sup>F/+</sup>;Trp53<sup>F/F</sup></i> | 147620      | 04DER-001-1  | SC/CS            | E      | -         | -         | +      | +             | -             | ± (cyt)   | -     |
|                                                    | 162944      | 04DER-004-1  | SC/CS            | E      | +         | ±         | -      | ±             | ±             | ±         | -     |
|                                                    | 139702      | 04DER-013-3  | SC/CS            | E      | +         | +         | -      | -             | +(f)          | +(f)      | ± (f) |
|                                                    | 162941      | 04DER-025-4  | SC/CS            | E      | +         | +         | +(f)   | +(f)          | +             | +         | +     |
|                                                    | 140035      | 04DER-034-5  | SC/CS            | E      | +(d)      | -         | -      | ±(d)          | ±             | ±         | -     |
|                                                    | 139703      | 04DER-053-3  | SC/CS            | E      | ND        | ND        | -      | ±             | -             | +(cyt)    | -     |
|                                                    | 162962      | 04DER-063-4  | SC/CS            | E      | +         | +(f)      | -      | -             | +             | +         | -     |
|                                                    | 167035      | 04DER-076-5  | SC/CS            | E      | -         | -         | +(f)   | ±             | -             | -         | -     |
| <i>Wcre;Cdh1<sup>F/F</sup>;Trp53<sup>F/F</sup></i> | 162942      | 04DER-007-1  | SC/CS + mILC     | I      | ± (d,epi) | ± (d,epi) | -      | ± (f,sar)     | -             | ± (f,cyt) | -     |
|                                                    | 168035      | 04DER-012-1  | SC/CS + mILC     | I      | +         | +         | -      | -             | -             | ± (f,cyt) | ± (f) |
|                                                    | 162943      | 04DER-016-1  | SC/CS            | I      | ± (d,epi) | ± (d,epi) | -      | +(sar)        | -             | ± (f,cyt) | -     |
|                                                    | 162965      | 04DER-018-1  | mILC             | I      | +         | +         | -      | -             | -             | -         | -     |
|                                                    | 167994      | 04DER-019-4  | SC/CS + mILC     | I      | +         | +         | -      | -             | -             | ± (f,cyt) | -     |
|                                                    | 167010      | 04DER-036-3  | SC/CS            | I      | +         | +         | -      | -             | -             | -         | ± (f) |
|                                                    | 167894      | 04DER-044-2  | SC/CS + mILC     | E+I    | +         | +         | -      | -             | +             | +         | -     |
|                                                    | 147616      | 04DER-061-1  | mILC             | I      | +         | +(f)      | -      | -             | -             | -         | ± (f) |
|                                                    | 191733      | 04DER-106-4  | SC/CS            | E      | -         | -         | +      | +             | -             | ± (cyt)   | -     |
| 191765                                             | 04DER-111-3 | SC/CS + mILC | I                | +(epi) | +         | +(f,sar)  | -      | -             | ± (f,cyt)     | ± (f)     |       |
| <i>Wcre;Cdh1<sup>F/F</sup>;Trp53<sup>F/+</sup></i> | 191752      | 05DER-029-1  | SC/CS            | E      | +         | -         | -      | +             | -             | ± (f,cyt) | -     |
|                                                    | 180578      | 05DER-015-12 | SC/CS + mILC     | I      | +(epi)    | -         | -      | ± (sar)       | -             | ± (cyt)   | -     |
|                                                    | 144462      | 04DER-209-4  | mILC (sol)       | I      | +         | +(f)      | -      | -             | -             | -         | -     |
|                                                    | 198392      | 05DER90-1    | SC/CS            | I      | +(f)      | +(f)      | -      | ± (sar)       | -             | ± (cyt)   | -     |
|                                                    | 175074      | 05DER098     | mILC             | I      | +         | ±         | -      | -             | -             | -         | -     |

*E=expansive, I=invative, (sol)=solid type, f=focal, cyt=cytosol, mem=membrane, d=differential staining, epi=epithelial cells, sar=sarcomatoid cells, ND=not done*
