# Supplementary material for: Mammary-specific inactivation of E-cadherin and p53 impairs functional gland development and leads to pleomorphic invasive lobular carcinoma in mice
Source: PubMed Central journal article supplement — Dis Model Mech. 2011 Jan 31;4(3):347–58. doi: 10.1242/dmm.006395 (PMC3097456; doi:10.1242/dmm.006395), 2011-01-31
Supplement: supp_006395_DMM006395TableS2.pdf [file supp_006395_DMM006395TableS2.pdf]

## Supplementary Table 2

Tumor spectrum and incidence in the *Wcre;Cdh1<sup>F</sup>;Trp53<sup>F</sup>* mouse model.

| <b>genotype</b>                                    | <b>total</b> | <b>invasive</b> | <b>mets</b> | <b>AC</b> | <b>SC/CS</b> | <b>mILC</b> |
|----------------------------------------------------|--------------|-----------------|-------------|-----------|--------------|-------------|
| <i>Wcre;Trp53<sup>F/F</sup></i>                    | 26           | 3 (12%)         | 2 (8%)      | 8 (31%)   | 24 (92%)     | 0 (0%)      |
| <i>Wcre;Cdh1<sup>F/+</sup>;Trp53<sup>F/F</sup></i> | 27           | 3 (11%)         | 3 (11%)     | 4 (15%)   | 27 (100%)    | 0 (0%)      |
| <i>Wcre;Cdh1<sup>F/F</sup>;Trp53<sup>F/F</sup></i> | 26           | 25 (96%)        | 21 (81%)    | 0 (0%)    | 20 (77%)     | 20 (77%)    |
| <i>Wcre;Cdh1<sup>F/F</sup>;Trp53<sup>F/+</sup></i> | 17           | 12 (71%)        | 9 (53%)     | 1 (6%)    | 9 (53%)      | 7 (41%)     |
| all <i>Wcre;Cdh1<sup>F/F</sup>;Trp53</i>           | 43           | 37 (86%)        | 20 (70%)    | 1 (2%)    | 29 (67%)     | 27 (63%)    |

mets= metastasis
