# Supplementary figures and images for: Mammary-specific inactivation of E-cadherin and p53 impairs functional gland development and leads to pleomorphic invasive lobular carcinoma in mice
Source: PubMed Central journal article supplement — Dis Model Mech. 2011 Jan 31;4(3):347–58. doi: 10.1242/dmm.006395 (PMC3097456; doi:10.1242/dmm.006395), 2011-01-31

*Cdh1<sup>F/F</sup>;Trp53<sup>F/F</sup>*

*Wcre;Cdh1<sup>F/F</sup>;Trp53<sup>F/F</sup>*

HE

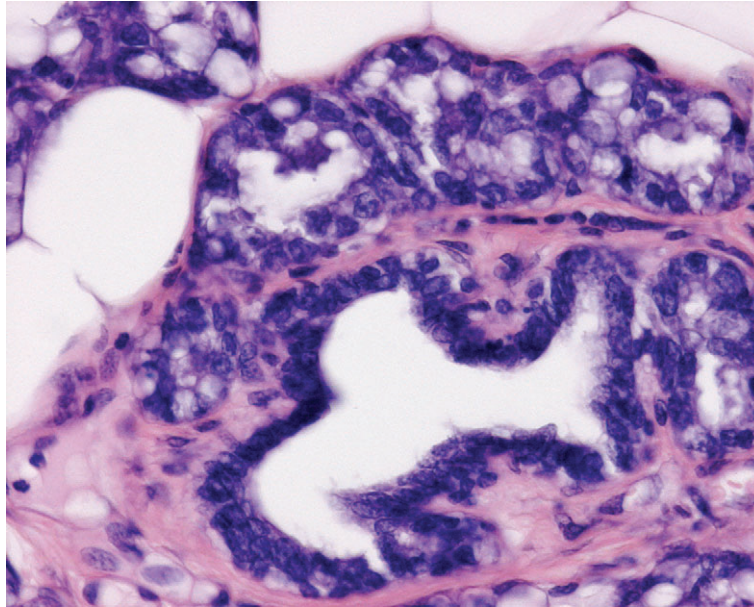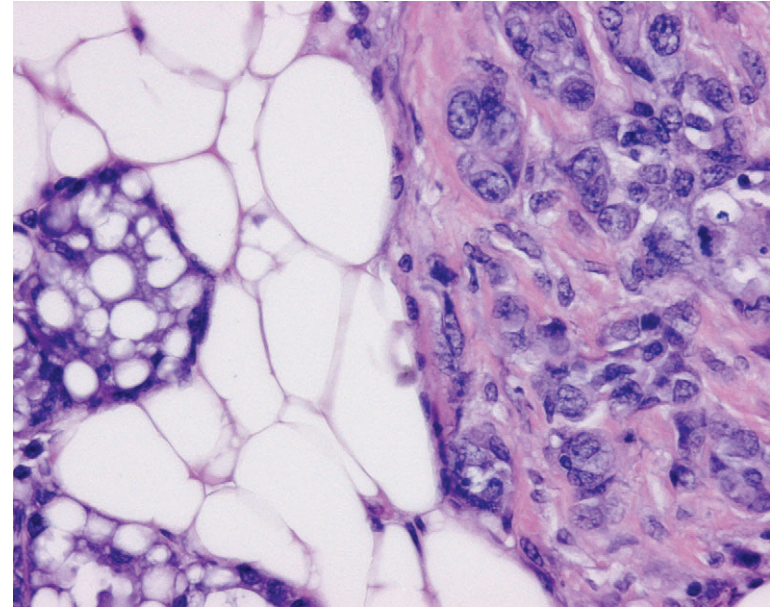

E-cadherin

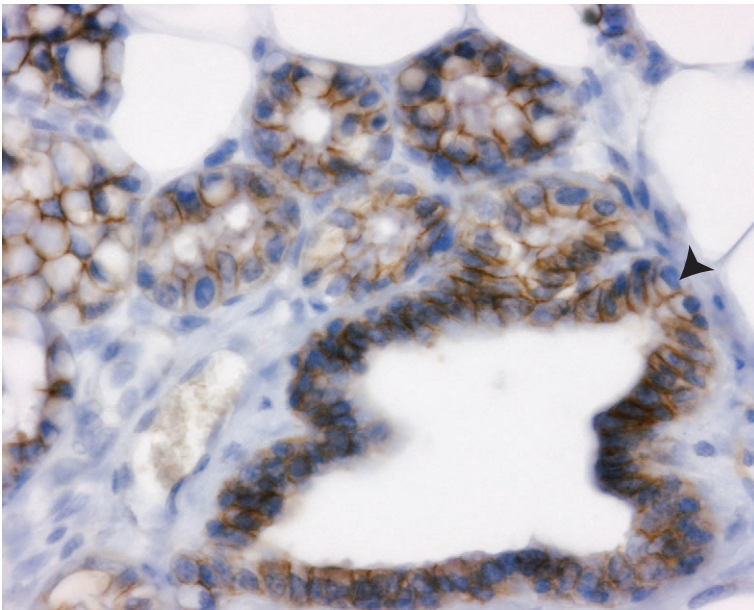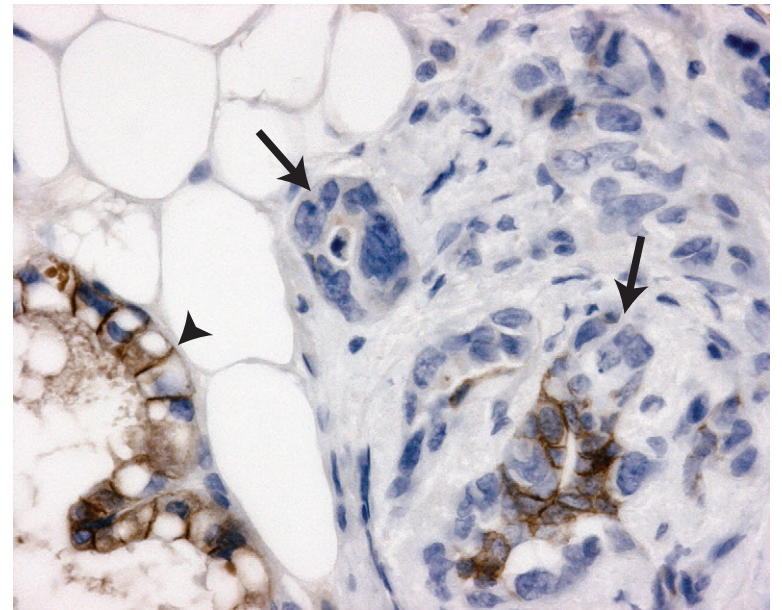

Supplement: supp_006395_DMM006395FigS3.pdf [file supp_006395_DMM006395FigS3.pdf]
